# Supplementary material for: Controlling nickel nanoparticle size in an organic/metal–organic matrix through the use of different solvents
Source: Royal Society of Chemistry journal article supplement (doi:10.1039/c3nr04883g), 2013-01-01
Supplement: c3nr04883g.pdf [file c3nr04883g.pdf]

## Supplementary Information – Controlling Nickel Nanoparticle Size in an Organic/Metal-Organic Matrix Through the Use of Different Solvents

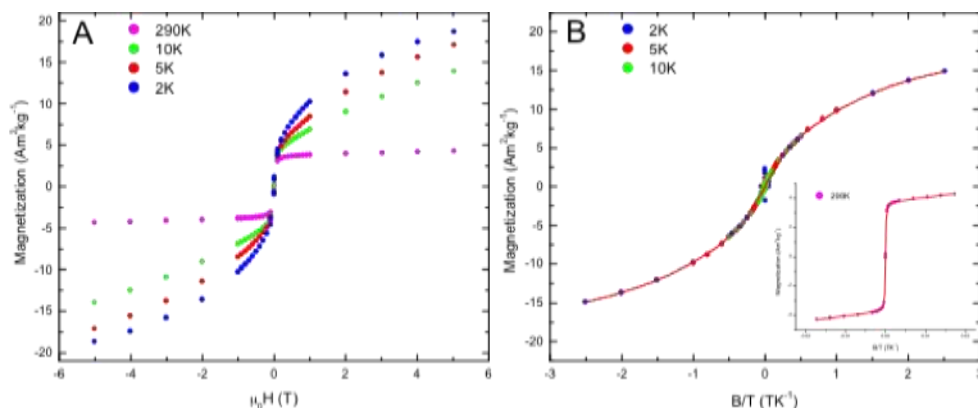

**S1: A:** Magnetization vs. applied field for sample 2 (solvent: THF/DCM). **B:** M vs. B/T where once the magnetization from the Langevin component has been subtracted the low temperature data can be scaled onto the 2 K curve. *inset:* Langevin function and a linear component fit to the 290 K data when plotted as M vs. B/T

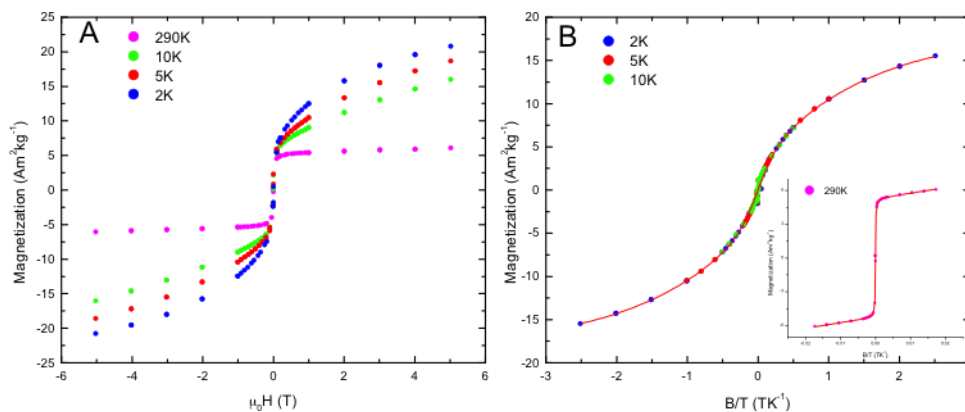

**S2: A:** Magnetization vs. applied field for sample 4 (solvent: THF/DCB). **B:** M vs. B/T where once the magnetization from the Langevin component has been subtracted the low temperature data can be scaled onto the 2 K curve. *inset:* Langevin function and a linear component fit to the 290 K data when plotted as M vs. B/T

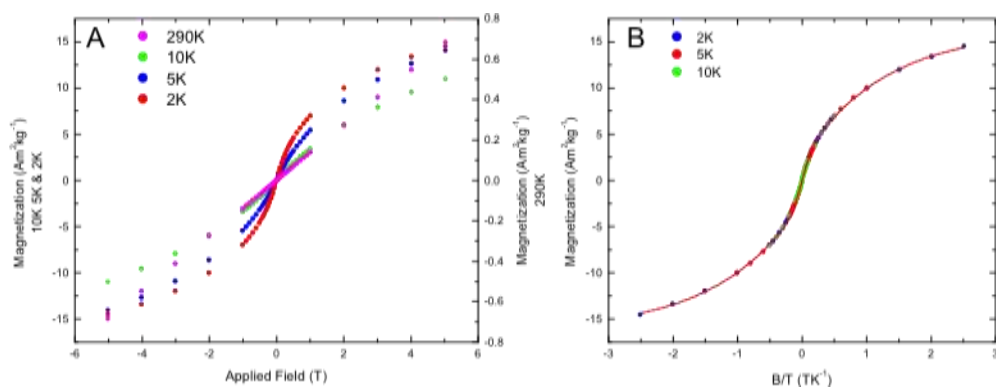

**S3: A:** Magnetization vs. applied field **B:** A scaled  $M$  vs.  $B/T$  plot for sample 5 (solvent: THF/PhCN). The fit to the data is a two-term Langevin function.

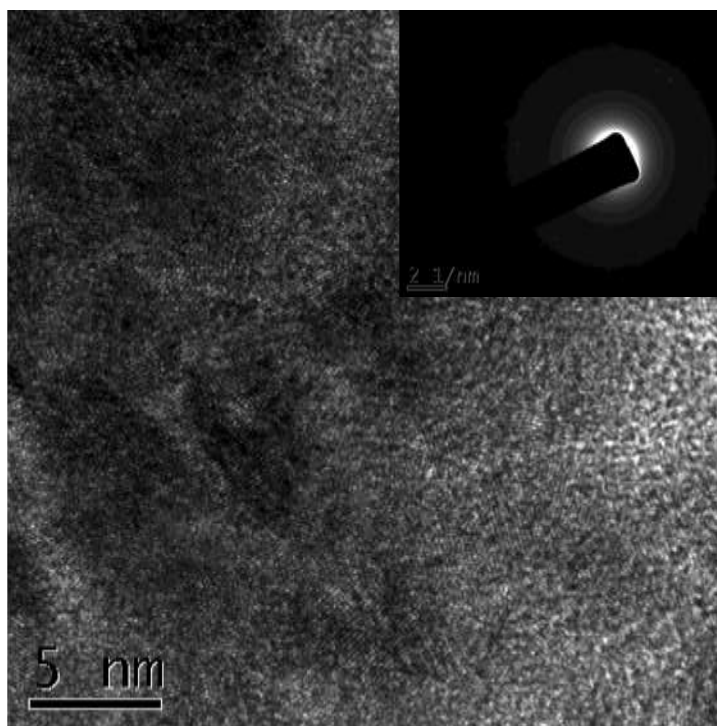

**S4:** High Resolution TEM image of Sample 1 showing ordered regions but with no distinct particles observed. *Inset:* Diffraction pattern of the imaged area.

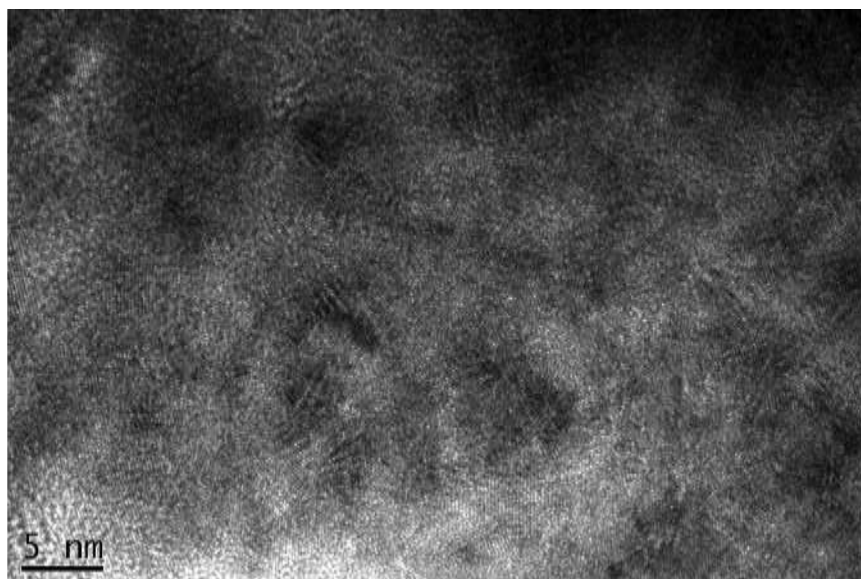

**S5:** High-resolution TEM image of Sample 1 illustrating that crystalline regions exist but no detailed particle sizes can be calculated.
